# Supplementary material
Source: PubMed Central journal article supplement (PMC3287039)

**Supplementary figure 1**

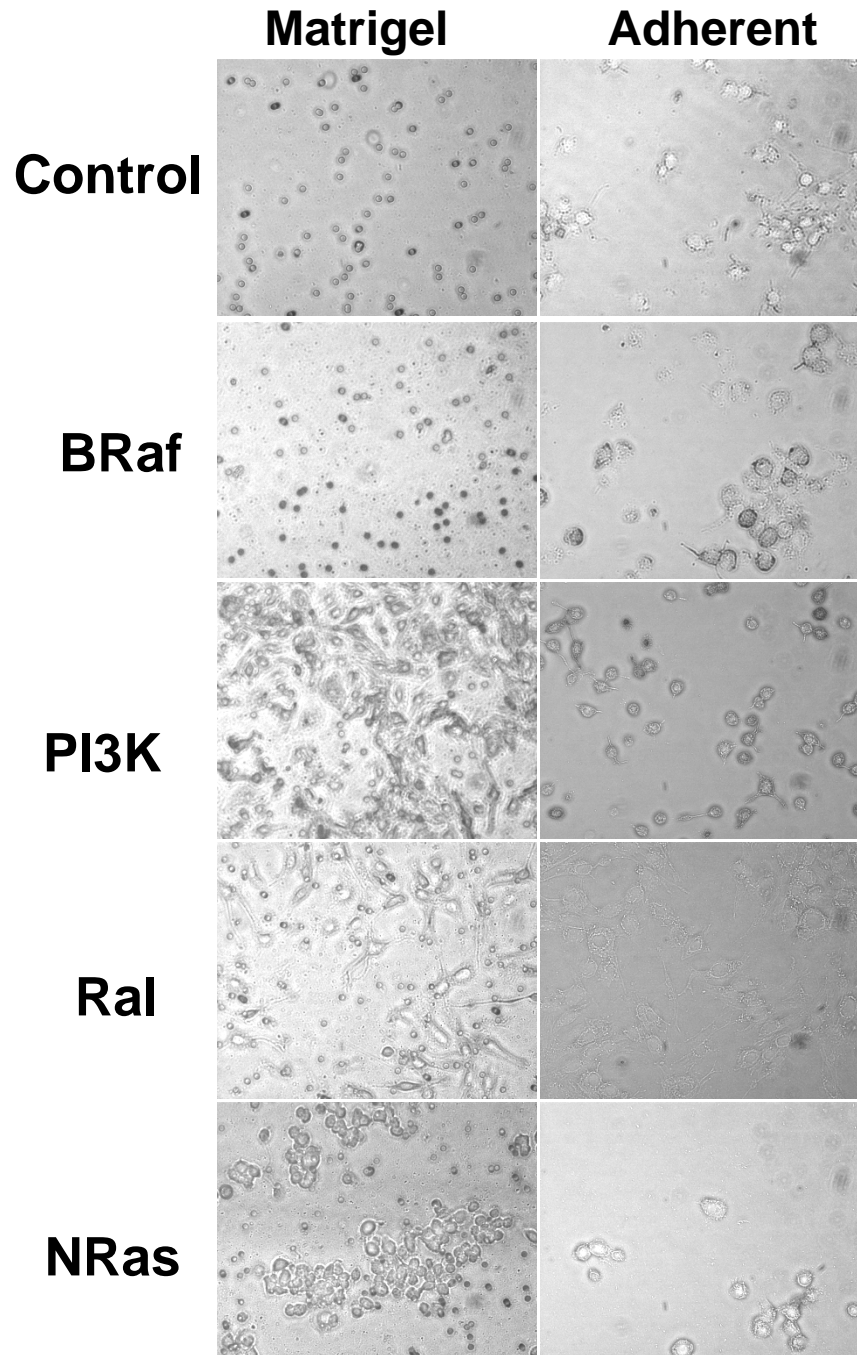

Supplement: NIHMS357536-supplement-Figure_S1.pdf [file NIHMS357536-supplement-Figure_S1.pdf]

## Supplementary figure 2

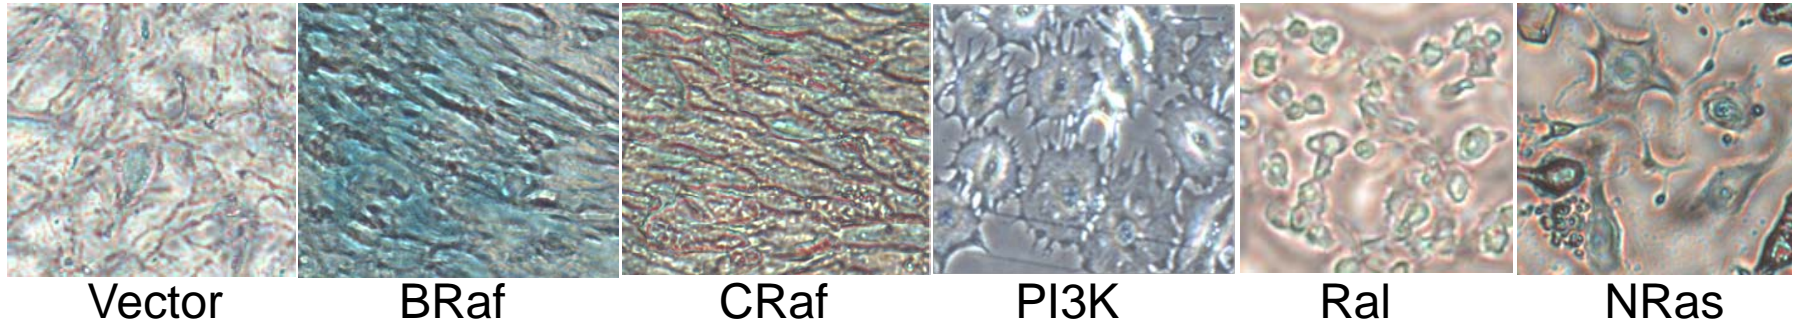

Supplement: NIHMS357536-supplement-Figure_S2.pdf [file NIHMS357536-supplement-Figure_S2.pdf]
